# Supplementary material for: Multimode vibronic spectra of the Holstein molecular crystal model
Source: Royal Society of Chemistry journal article supplement (doi:10.1039/b925286j), 2010-01-01
Supplement: b925286j.pdf [file b925286j.pdf]

# Supporting information for Multimode vibronic spectra of the Holstein molecular crystal model

Qingmei Liu, Jun Ye and Yang Zhao\*

*School of Materials Science and Engineering,  
Nanyang Technological University, Singapore 639798*

(Dated: February 12, 2010)

---

\* Electronic address: [YZhao@ntu.edu.sg](mailto:YZhao@ntu.edu.sg)

## I. THE BROWNIAN OSCILLATOR MODEL

The MBO Hamiltonian is given by [1–5]

$$H = |g\rangle H_g \langle g| + |e\rangle H_e \langle e| + H', \quad (1)$$

where

$$H_g = \sum_j \left[ \frac{p_j^2}{2m_j} + \frac{1}{2} m_j \omega_j^2 q_j^2 \right], \quad (2)$$

$$H_e = \hbar\omega_{eg}^0 + \sum_j \left[ \frac{p_j^2}{2m_j} + \frac{1}{2} m_j \omega_j^2 (q_j + d_j)^2 \right], \quad (3)$$

and

$$H' = \sum_n \left[ \frac{P_n^2}{2m_n} + \frac{1}{2} m_n \omega_n^2 \left( Q_n - \sum_j \frac{c_{nj} q_j}{m_n \omega_n^2} \right)^2 \right]. \quad (4)$$

Here  $p_j$  ( $P_n$ ),  $q_j$  ( $Q_n$ ),  $m_j$  ( $m_n$ ), and  $\omega_j$  ( $\omega_n$ ) are the momentum, the coordinate, the mass, and the angular frequency of the  $j$ th ( $n$ th) nuclear mode of the primary (bath) oscillators, respectively.  $d_j$  represents the displacement for the  $j$ th nuclear mode in the excited electronic state.  $\hbar\omega_{eg}^0$  is the energy separation of the purely electronic levels.  $H'$  describes the bath modes and their coupling to the primary oscillators with a coupling strength  $c_{nj}$ . The cross terms in  $q_j Q_n$  are responsible for damping. By defining the energy gap coordinate operator  $U$  as:

$$U = H_e - H_g - \hbar\omega_{eg}^0. \quad (5)$$

We can write the correlation function for the  $j$ th mode from the parameters of the Hamiltonian:

$$C_j(t) = -\frac{1}{2\hbar^2} [\langle U(t)U(0)\rho_g \rangle - \langle U(0)U(t)\rho_g \rangle], \quad (6)$$

where  $U(t)$  is the operator  $U$  in the interaction representation and  $\rho_g$  is the equilibrium ground-state vibrational density matrix:

$$\rho_g = \frac{|g\rangle\langle g| \exp(-\beta \hat{H}_g)}{\text{Tr} [\exp(-\beta \hat{H}_g)]} \quad (7)$$

with  $\beta = 1/k_B T$ .

In the present study, we adopt a simple form of the BO model with the bath modes is assumed to be a constant (i.e.,  $\gamma_j(\omega) = \text{constant}$ , called Markovian or Ohmic limit) to

compute PL spectra. For this simple case, the spectral density function reads [3]

$$\tilde{C}_j''(\omega) = \frac{2\lambda_j\omega_j^2\omega\gamma_j}{\omega^2\gamma_j^2 + (\omega_j^2 - \omega^2)^2}, \quad (8)$$

where the real part of the self-energy,  $\Sigma_l(\omega)$ , is set to zero.

The spectral response function  $g(t)$  can be expressed in terms of the frequency-domain correlation function  $C_j''(\omega)$

$$g(t) = -\frac{1}{2\pi} \int_{-\infty}^{\infty} d\omega \frac{\sum_j \tilde{C}_j''(\omega)}{\omega^2} [1 + \coth(\beta\hbar\omega/2)] (e^{-i\omega t} + i\omega t - 1). \quad (9)$$

Finally, the linear absorption and the relaxed fluorescence line shape can be then obtained from the spectral response function  $g(t)$ :

$$\sigma_{abs}(\omega) = \frac{1}{\pi} \text{Re} \int_0^{\infty} dt \exp [i(\omega - \omega_{eg}^0 - \lambda)t - g(t)] \quad (10)$$

$$I_{PL}(\omega) = \frac{1}{\pi} \text{Re} \int_0^{\infty} dt \exp [i(\omega - \omega_{eg}^0 + \lambda)t - g^*(t)] \quad (11)$$

Without the coupling to the bath phonons, the Huang-Rhys theory [6] gives a Poisson distribution for phonon side peaks in the absorption spectrum at zero temperature:

$$\sigma_{abs}(\omega) = \exp(-S_j) \sum_{n=0}^{\infty} \frac{S_j^n}{n!} \delta(\omega - \omega_{eg} - n\omega_j) \quad (12)$$

$S$  here is the intensity ratio between the first and zeroth phonon lines, and can also be identified with the average number of phonons emitted. For larger  $S$ , the Poisson distribution morphs into a Gaussian centered at  $S$ . Upon broadening due to bath dissipation and thermal effects, the well-resolved phonon peaks will acquire widths that increase with  $n$ . The width of the individual phonon peaks also increase with the temperature, linearly if the bath is Markovian [7].

## II. LIMITING CASES

If there is only one Einstein phonon mode that is coupled to the exciton, no quadratic term included, and no transfer integral  $J$  considered, the Hamiltonian of the system at zero temperature recovers the form from the independent boson model:

$$\hat{H} = E_0 a^\dagger a + g a^\dagger a (b^\dagger + b) + \omega_0 b^\dagger b \quad (13)$$

As the bath phonons are assumed to be dispersionless, for the 0K case, the phonon occupation factors are zero, thus the Green's function has the form

$$G(t) = -i\theta(t)\exp[-itE_0 - g(1 - i\omega_0t - e^{-i\omega_0t})] \quad (14)$$

The spectral function is the imaginary part of the retarded Green's function of frequency:

$$A(\omega) = -2\text{Im}(-i) \int_0^\infty dt e^{i\omega t} \exp[-itE_0 - g(1 - i\omega_0t - e^{-i\omega_0t})] \quad (15)$$

or

$$A(\omega) = 2\text{Re} \int_0^\infty dt \exp[it(\omega - E_0 + g\omega_0) - g + ge^{-i\omega_0t}] \quad (16)$$

By expanding the  $ge^{-i\omega_0t}$  part of the exponent in a power series:

$$\exp(ge^{-i\omega_0t}) = \sum_l \frac{g^l}{l!} e^{-i\omega_0lt} \quad (17)$$

it is possible to evaluate the time integral, so that it contains terms such as:

$$\int_0^\infty dt \exp[it(\omega - E_0 + g\omega_0 - \omega_0l)] = \frac{i}{\omega - E_0 + g\omega_0 - \omega_0l + i\delta} \quad (18)$$

If the limit  $\delta \rightarrow 0$  is taken,

$$\frac{i}{\omega - E_0 + g\omega_0 - \omega_0l + i\delta} = P \frac{i}{\omega - E_0 + g\omega_0 - \omega_0l} + \pi\delta(\omega - E_0 + g\omega_0 - \omega_0l) \quad (19)$$

The spectral functional can then be expressed as the real part of this time integral, which is a series of delta functions

$$A(\omega) = 2\pi e^{-g} \sum_{\lambda=0}^{\infty} \frac{g^\lambda}{\lambda!} \delta(\omega - E_0 + g\omega_0 - \omega_0\lambda) \quad (20)$$

This spectral function provides a Poisson distribution of delta peaks with equal spacing of  $\omega_0$ , which is equivalent to the well-known Huang-Rhys theory[6].

- [1] J. Ye, Y. Zhao, N. Ng, and J. S. Cao, *J. Phys. Chem. B* **113**, 5897, (2009).  
 [2] S. Mukamel, *Principles of Nonlinear Optical spectroscopy*, Oxford University Press: Oxford, 1995.  
 [3] Y. Zhao and R. S. Knox, *J. Phys. Chem. A* **104**, 7751, (2000); J. Ye, A. Grimsdale, and Y. Zhao, *J. Phys. Chem. A* **113** (in press); F. Gao, W.Z. Liang, and Y. Zhao, *J. Phys. Chem. A* **113**, 12847, (2009); L.T. Su, A. Tok, Y. Zhao, N. Ng, and F.Y.C. Boey, *J. Phys. Chem. B* **113**, 5974, (2009).

- [4] S. L. Shi, G. Q. Li, S.J. Xu, Y. Zhao and G. H. Chen, *J. Phys. Chem. B* **110**, 10475, (2006).
- [5] S. J. Xu, G. Q. Li, Y. J. Wang, Y. Zhao, G. H. Chen, D. G. Zhao, J. J. Zhu, and H. Yang, *Appl. Phys. Lett.* **88**, 083123, (2006).
- [6] K. Huang, and A. Rhys, *Proc. R. Soc. (London) A* **204**, 406, (1950).
- [7] R. S. Knox, G. J. Small, and S. Mukamel, *Chem. Phys.* **281**, 1, (2002).
